# Supplementary material
Source: Springer Nature journal article supplement (https://www.springermedizin.de/resource/supplementary/13063_2010_501_MOESM2_ESM.pdf/9618354)
Supplement: MOESM2 [file 9618354]

**Identify principal endpoint**

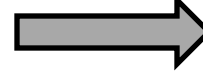

**Analysis of acupuncture and sham effects**

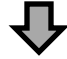

**Primary analysis**

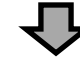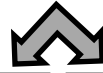

**Acupuncture vs. Sham**

- Osteoarthritis
- Headache
  - ▶ Chronic tension
  - ▶ Migraine
- Non-specific musculoskeletal pain
  - ▶ Back
  - ▶ Neck
- Shoulder pain

**Acupuncture vs. No acupuncture**

- Osteoarthritis
- Headache
  - ▶ Chronic tension
  - ▶ Migraine
- Non-specific musculoskeletal pain
  - ▶ Back
  - ▶ Neck
- Shoulder pain

- Variation in the effects of acupuncture by indication
- Effect of acupuncture characteristics on outcome
- Effects of different types of sham control
- Time course of acupuncture effects
- Individual-patient differences in response to acupuncture
- Differences in outcome between practitioners
- Predictors of acupuncture effect

**Sensitivity analysis**

**Secondary endpoints**

|                          |          |                        |            |
|--------------------------|----------|------------------------|------------|
| Pain                     | Function | QoL                    | Medication |
| 1, 2, 3, 6, 9, 12 months |          |                        |            |
| Arthritis                | Headache | Musculoskeletal        | Shoulder   |
| Sham control             |          | No acupuncture control |            |
